# Supplementary material for: A bis(1H-pyridin-2-one)salen Eu(iii) complex for vapoluminescence sensing
Source: Royal Society of Chemistry journal article supplement (doi:10.1039/c5qi00134j), 2015-01-01
Supplement: c5qi00134j1.pdf [file c5qi00134j1.pdf]

Supporting Information for:

## A bis(1H-pyridin-2-one)salen Eu(III) complex for vapoluminescent sensing

Yu-Bo Shu<sup>a,b</sup> and Wei-Sheng Liu<sup>a\*</sup>

<sup>a</sup> College of Chemistry and Chemical Engineering, Lanzhou University, Lanzhou 730000, China.

<sup>b</sup> School of Chemical and Biological Engineering, Hechi University, Yizhou 546300, China.

E-mail: liuws@lzu.edu.cn; ybshu@foxmail.com

### Table of Contents

#### Materials and instruments

**Fig. S1** IR spectrum of **1**

**Fig. S2** Powder X-ray diffraction pattern of **1**

**Fig. S3** Luminescence decay profile of **1**

**Fig. S4** Coordination geometry of Eu(III) in **1**

**Fig. S5** Hydrogen bonding environments in **1**

**Fig. S6** Emission spectra of (a) ligand powder after exposure to HCl vapor for five minutes and (b) Eu(III) complex film after exposure to HCl vapor.

## Materials and instruments

All reagents were commercially available and were used without further purification. The H<sub>2</sub>L ligand was synthesized by reaction of ethylenediamine (1.202 g, 0.02 mol) with 2-hydroxynicotinaldehyde (4.924 g, 0.04 mol) in ethanol (100 mL) under reflux for 1 day. The 2-hydroxynicotinaldehyde was synthesized according to the literature<sup>S1,S2</sup>. Infrared spectra were recorded on a Nicolet FT-170SX instrument using KBr discs in the 400–4000 cm<sup>-1</sup> region. Powder X-Ray diffraction (PXRD) patterns were collected with a PANalytical X'Pert Pro Diffractometer operated at 40 kV and 40 mA with Cu K $\alpha$  radiation (step size: 0.0167113°, step time: 10.16 s). Elemental analyses were performed using an Elementar Analysensysteme GmbH varioEL cube instrument. Reflectance spectra were recorded on a Shimadzu UV-2550 UV-Visible Spectrophotometer at room temperature. Steady-state excitation and emission spectra were recorded on FLS920 of Edinburgh Instrument at room temperature. The spectral changes during HCl–Et<sub>3</sub>N vapour exposure cycles were collected on a Hitachi F-7000 spectrofluorimeter.

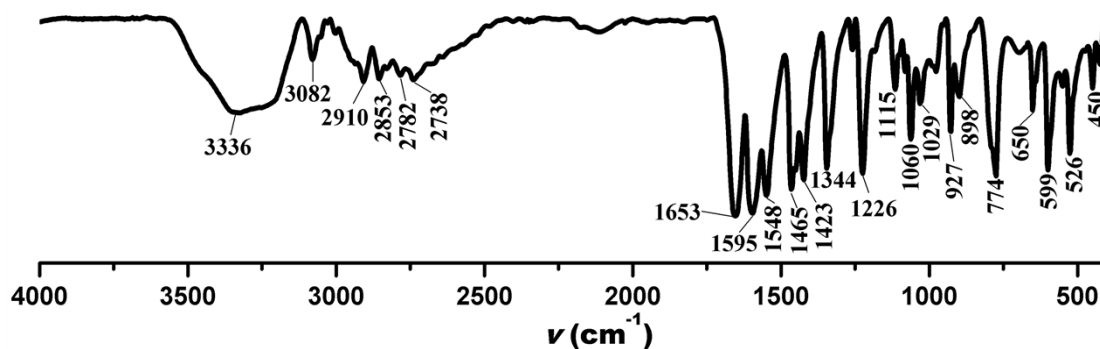

Fig. S1 IR spectrum of 1.

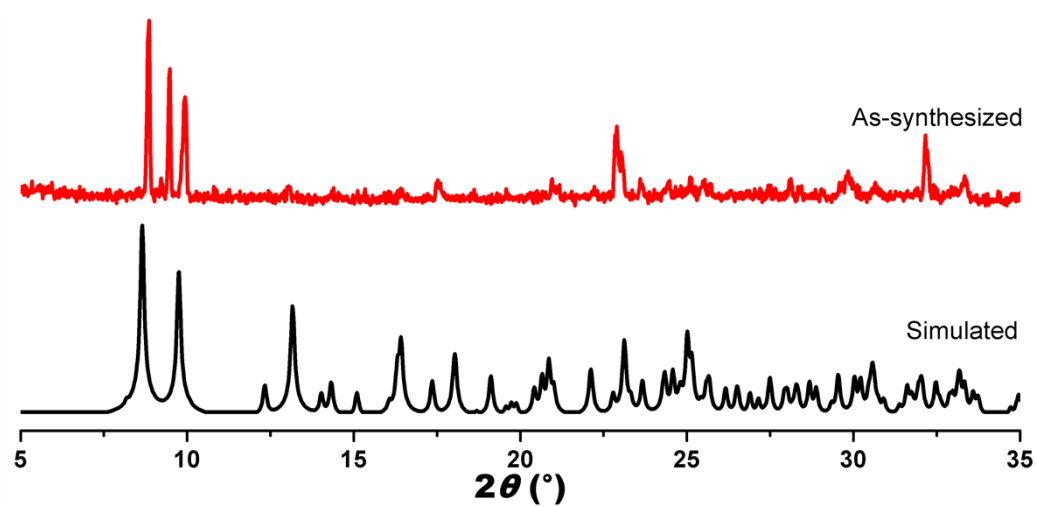

Fig. S2 Powder X-ray diffraction pattern of **1**.

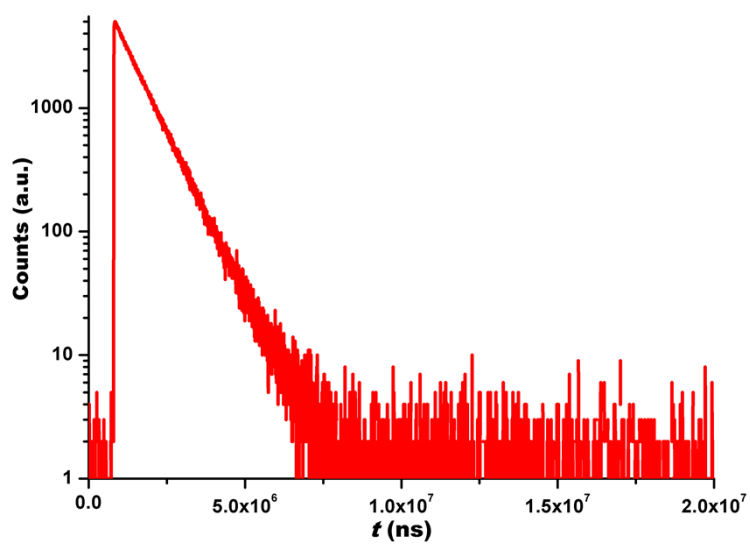

Fig. S3 Luminescence decay profile of **1**.

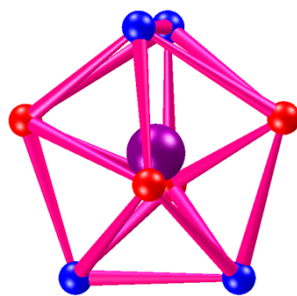

Fig. S4 Coordination geometry of Eu(III) in **1**.

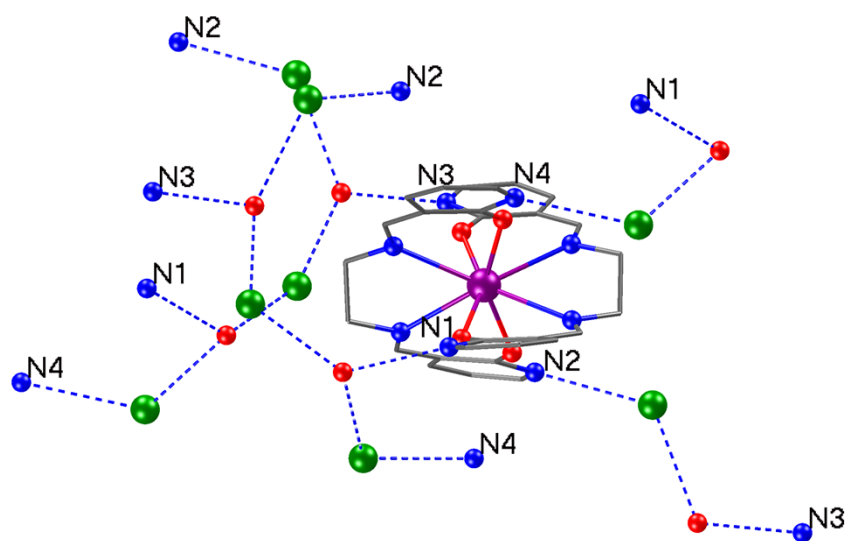

**Fig. S5** Hydrogen bonding environments in **1**.

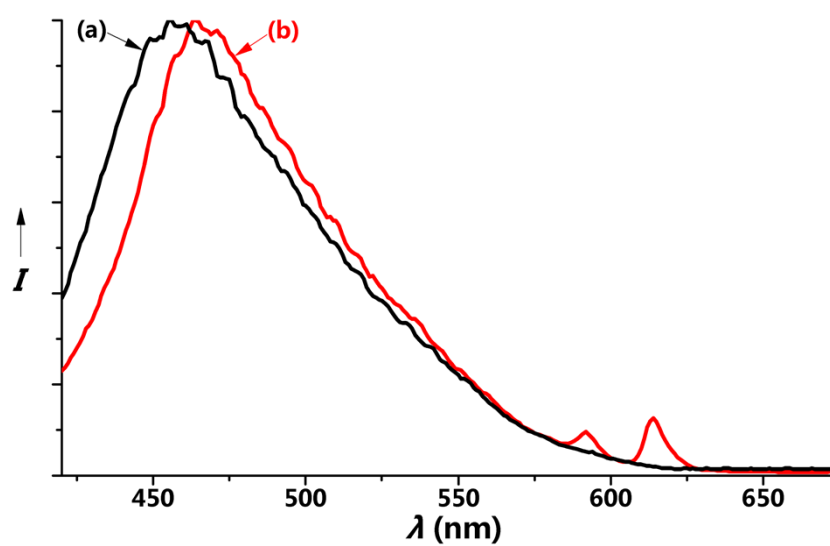

**Fig. S6** Emission spectra of (a) ligand powder after exposure to HCl vapor for five minutes and (b) Eu(III) complex film after exposure to HCl vapor.

## REFERENCES

S1 E. Metay, E. Léonel, J. Y. Nédélec, *Syn. Commun.*, 2008, **38**, 889.

S2 F. Trecourt, F. Marsais, T. Gungor, G. Queguiner, *J. Chem. Soc. Perkin Trans. I*, **1990**, 2409.
